# Supplementary material
Source: PubMed Central journal article supplement (PMC3121544)
Supplement: ndd0008-0296-s01.pdf [file ndd0008-0296-s01.pdf]

**Supplemental Table. Population characteristics of PD cases and controls**

|                         | PD Cases (%) | Controls (%) |
|-------------------------|--------------|--------------|
| Gender                  |              |              |
| Men                     | 606 (76.9)   | 725 (79.6)   |
| Women                   | 182 (23.1)   | 186 (20.4)   |
| Year of birth           |              |              |
| 1925–1929               | 280 (35.5)   | 353 (38.8)   |
| 1930–1934               | 265 (33.6)   | 321 (35.2)   |
| 1935–1939               | 158 (20.1)   | 158 (17.3)   |
| 1940–                   | 85 (10.8)    | 79 (8.7)     |
| Smoking status          |              |              |
| Never                   | 363 (46.1)   | 318 (34.9)   |
| Ever                    | 418 (53.0)   | 590 (64.8)   |
| Missing                 | 7 (0.9)      | 3 (0.3)      |
| rs8034191               | 324 (41.1)   | 413 (45.4)   |
|                         | 388 (49.2)   | 399 (43.9)   |
|                         | 76 (9.6)     | 98 (10.8)    |
| rs17486278              | 329 (41.8)   | 414 (45.5)   |
|                         | 385 (48.9)   | 398 (43.8)   |
|                         | 74 (9.4)     | 97 (10.7)    |
| rs569207                | 448 (56.9)   | 532 (58.4)   |
|                         | 290 (36.8)   | 323 (35.5)   |
|                         | 50 (6.4)     | 56 (6.2)     |
| rs16969968              | 329 (41.8)   | 415 (45.6)   |
|                         | 384 (48.7)   | 399 (43.8)   |
|                         | 75 (9.5)     | 97 (10.7)    |
| rs578776                | 397 (50.6)   | 460 (50.6)   |
|                         | 320 (40.8)   | 370 (40.7)   |
|                         | 68 (8.7)     | 80 (8.8)     |
| rs1051730               | 327 (41.6)   | 413 (45.5)   |
|                         | 385 (48.9)   | 399 (44.0)   |
|                         | 75 (9.5)     | 95 (10.5)    |
| rs6495308               | 446 (56.6)   | 527 (57.9)   |
|                         | 294 (37.3)   | 327 (35.9)   |
|                         | 48 (6.1)     | 56 (6.2)     |
| Age at onset, years     | 65.7±7.4     |              |
| Age at diagnosis, years | 66.6±7.4     |              |
